# Supplementary material for: Preparation and characterization of sulphur and zinc oxide Co-doped graphitic carbon nitride for photo-assisted removal of Safranin-O dye
Source: Royal Society of Chemistry journal article supplement (doi:10.1039/d3ra07247a), 2024-01-01
Supplement: d3ra07247a1.pdf [file d3ra07247a1.pdf]

1 **Supplementary Materials for the Manuscript**

2 **Preparation and Characterization of Sulphur and Zinc Oxide Co-Doped**  
3 **Graphitic Carbon Nitride for Photo-Assisted Removal of Safranin-O Dye**

4  
5 Azmat Ali Khan<sup>1</sup>, Abbas Khan<sup>1\*</sup>, Sumayya Khan<sup>1</sup>, Nasrullah Shah<sup>1</sup>, Ajmal Khan<sup>2</sup>, Faheem  
6 Nawaz<sup>3</sup>, Asaad Khalid<sup>4</sup>, Afnan Jan<sup>5</sup>, Ahmed Al-Harrasi<sup>\*2</sup>

7  
8 <sup>1</sup>*Department of Chemistry, Abdul Wali Khan University, Mardan 23200, KP, Pakistan; E-mails:*  
9 *[asaster45@gmail.com](mailto:asaster45@gmail.com) (Azmat A Khan), [abbas80@awkum.edu.pk](mailto:abbas80@awkum.edu.pk) (Abbas Khan),*

10 *[muhammadtalhay42@gmail.com](mailto:muhammadtalhay42@gmail.com) (S. K), [nasrullah@awkum.edu.pk](mailto:nasrullah@awkum.edu.pk) (N. S)*

11 <sup>2</sup>*Natural and Medical Sciences Research Center, University of Nizwa, PO Box 33, 616 Birkat Al*  
12 *Mauz, Nizwa, Oman; E-mails: [ajmalkhan@unizwa.edu.om](mailto:ajmalkhan@unizwa.edu.om) (Ajmal Khan) ;*

13 *[aharrasi@unizwa.edu.om](mailto:aharrasi@unizwa.edu.om) (Ahmed Al-Harrasi)*

14 <sup>3</sup>*Department of Environmental Science, Faculty of Life Sciences & Informatics, Balochistan*  
15 *University of Information Technology, Engineering and Management Sciences (BUITEMS),*  
16 *Quetta, Pakistan E-mail: [faheem.nawaz@buitms.edu.pk](mailto:faheem.nawaz@buitms.edu.pk) (Faheem Nawaz)*

17 <sup>4</sup>*Substance Abuse and Toxicology Research Center, Jazan University, P.O. Box: 114, Jazan*  
18 *45142, Saudi Arabia. [akahmed@jazanu.edu.sa](mailto:akahmed@jazanu.edu.sa) (A.K)*

19 <sup>5</sup>*Department of Biochemistry, Faculty of Medicine, Umm Al-Qura University, Makkah, Kingdom*  
20 *of Saudi Arabia. E-mail: [Amjan@uqu.edu.sa](mailto:Amjan@uqu.edu.sa) (A. J)*

21  
22 **Corresponding Authors:**

23 **Professor Dr. Abbas Khan**

24 Department of Chemistry, Abdul Wali Khan University Mardan, 23200, Pakistan. Telephone:  
25 +92-3408467885, Fax: +92-937-542188, E-mail: [abbas80@awkum.edu.pk](mailto:abbas80@awkum.edu.pk);  
26 [abbas053@gmail.com](mailto:abbas053@gmail.com)

27 **Professor Dr. Ahmed Al-Harrasi**

28 Natural and Medical Sciences Research Center, University of Nizwa, PO Box 33, 616 Birkat Al  
29 Mauz, Nizwa, Oman. E-mail: [aharrasi@unizwa.edu.om](mailto:aharrasi@unizwa.edu.om)

30

31

**Table S1.** Average crystalline size of the prepared nanomaterials.

| <b>S.NO.</b> | <b>Samples ID</b>                     | <b>Crystallite size (<math>D_p</math>), (nm)</b> |
|--------------|---------------------------------------|--------------------------------------------------|
| 1            | g-C <sub>3</sub> N <sub>4</sub>       | 08.09                                            |
| 2            | ZnO                                   | 09.07                                            |
| 3            | S-g-C <sub>3</sub> N <sub>4</sub>     | 10.98                                            |
| 4            | ZnO-S-g-C <sub>3</sub> N <sub>4</sub> | 11.13                                            |

32

33

34

35

36

37

38

39

40

41

42

43

44

45

46

47

48

49 **Table S2.** The elemental composition of g-C<sub>3</sub>N<sub>4</sub>, S-g-C<sub>3</sub>N<sub>4</sub>, and ZnO-S-g-C<sub>3</sub>N<sub>4</sub> from EDX.

| Sample                                | Element | Mass%  | Atomic% |
|---------------------------------------|---------|--------|---------|
| g-C <sub>3</sub> N <sub>4</sub>       | CK      | 81.26  | 83.49   |
|                                       | NK      | 18.78  | 16.51   |
|                                       | Total   | 100.00 | 100.00  |
| S-g-C <sub>3</sub> N <sub>4</sub>     | CK      | 75.82  | 78.53   |
|                                       | NK      | 23.18  | 20.47   |
|                                       | SK      | 1.00   | 1.00    |
|                                       | Total   | 100.00 | 100.00  |
| ZnO-S-g-C <sub>3</sub> N <sub>4</sub> | CK      | 55.82  | 60.29   |
|                                       | NK      | 12.18  | 16.21   |
|                                       | OK      | 1.00   | 1.12    |
|                                       | KK      | 1.38   | 0.36    |
|                                       | Zn      | 1.01   | 1.02    |
|                                       | S       | 1.00   | 1.00    |
|                                       | Total   | 100.00 | 100.00  |

50

51

52

53

54

55

56

57 **Table S3.** First-order rate constant, regression values and percentage removal efficiencies of  
58 prepared catalysts toward the photocatalytic degradation of Safranin-O.

| S.NO | Catalyst                                             | Dye | Conditions           | Time of Experiment (Minutes) | removal (%) | R <sup>2</sup> Value for 1 <sup>st</sup> Order Plot | 1 <sup>st</sup> Order Rate Constant, k (min <sup>-1</sup> ) | References   |
|------|------------------------------------------------------|-----|----------------------|------------------------------|-------------|-----------------------------------------------------|-------------------------------------------------------------|--------------|
| 1    | g-C <sub>3</sub> N <sub>4</sub>                      | SO  | UV-Light             | 360                          | 69.00       | 0.94660                                             | 0.00249                                                     | Present Work |
| 2    | g-C <sub>3</sub> N <sub>4</sub>                      | SO  | Dark                 | 480                          | 20.00       | 0.97152                                             | 0.00041                                                     | Present Work |
| 3    | S-g-C <sub>3</sub> N <sub>4</sub>                    | SO  | UV-Light             | 270                          | 88.54       | 0.90922                                             | 0.00690                                                     | Present Work |
| 4    | S-g-C <sub>3</sub> N <sub>4</sub>                    | SO  | Dark                 | 480                          | 36.22       | 0.84046                                             | 0.00066                                                     | Present Work |
| 5    | ZnO-S-g-C <sub>3</sub> N <sub>4</sub>                | SO  | UV-Light             | 150                          | 87.00       | 0.89186                                             | 0.00989                                                     | Present Work |
| 6    | ZnO-S-g-C <sub>3</sub> N <sub>4</sub>                | SO  | Dark                 | 480                          | 58.64       | 0.75568                                             | 0.00144                                                     | Present Work |
| 7    | SiO <sub>2</sub> -TiO <sub>2</sub>                   | SO  | UV-Light             | 12                           | 93          | 0.9983                                              | -                                                           | [61]         |
| 8    | PUCP1@rGO                                            | SO  | Visible light        | 90                           | 76          | -                                                   | -                                                           | [62]         |
| 9    | WO <sub>3</sub>                                      | SO  | UV irradiation       | 10                           | 94          | 0.9649                                              | 0.2566                                                      | [63]         |
| 10   | TiO <sub>2</sub>                                     | SO  | UV light             | 70                           | 60          | 0.996                                               | 0.025                                                       | [64]         |
| 11   | Ag-TiO <sub>2</sub>                                  | SO  | UV light             | 70                           | 96          | 0.987                                               | 0.035                                                       | [64]         |
| 12   | ZnO-CeO <sub>2</sub> -Yb <sub>2</sub> O <sub>3</sub> | SO  | Sunlight irradiation | 40                           | 68          | -                                                   | 0.0264                                                      | [65]         |
| 13   | HNTs                                                 | SO  | -                    | 360                          | 98          | 0.867                                               | 0.00679                                                     | [66]         |
| 14   | Ag/Pd                                                | SO  | UV-light             | 40                           | 98          | 0.98783                                             | 0.00571                                                     | [67]         |
| 15   | Ag-NPs                                               | SO  | Light                | 120                          | 70          | 0.99                                                | -                                                           | [68]         |

59

60

61

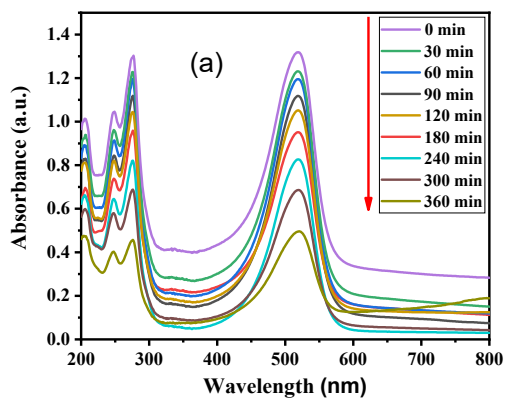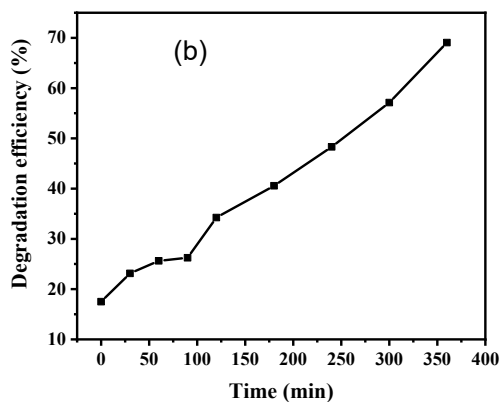

62

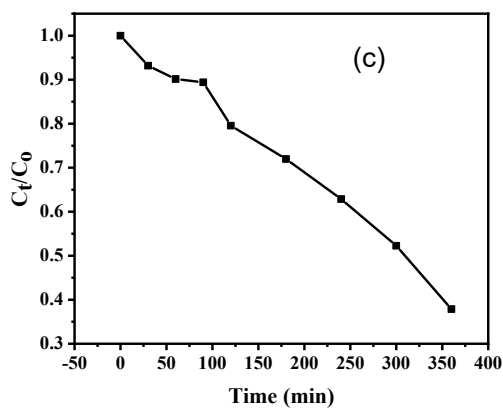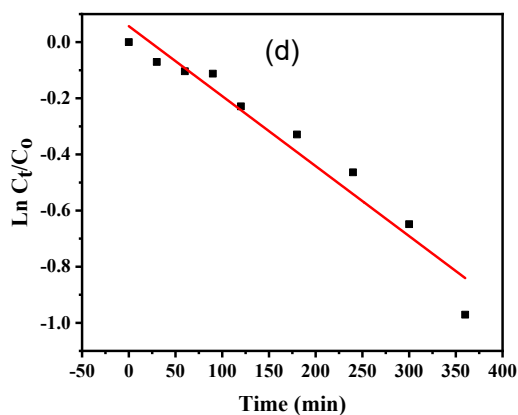

63

64 **Figure S1.** SO degradation with the aid of 0.1 g g- $C_3N_4$  in the presence of light; (a) Change in UV-  
 65 Visible absorbance spectra at different time intervals, (b) degradation efficiency, (c) absorbance  
 66 ratio ( $C_t/C_0$ ) versus time, (d) plot of pseudo-first-order kinetics of degradation.

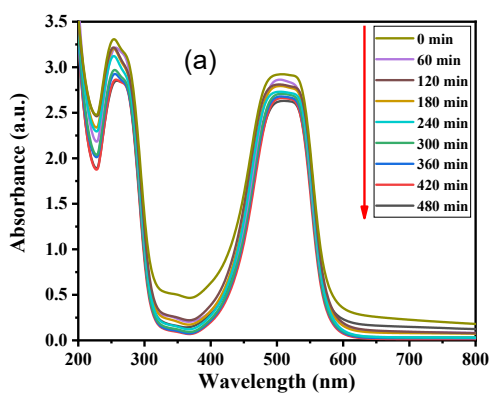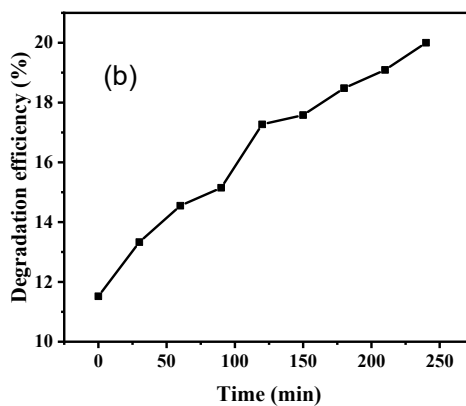

67

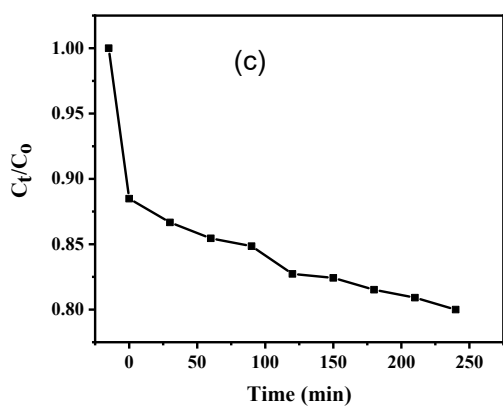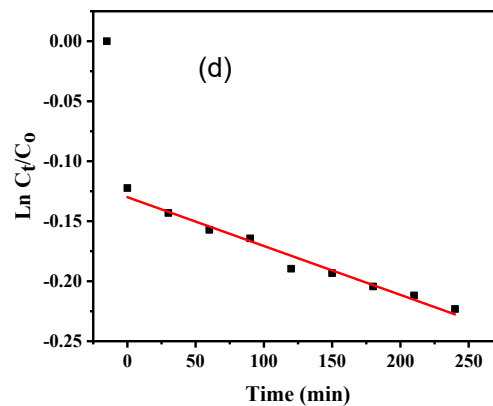

68

69 **Figure S2.** SO degradation with the aid of 0.1g g-C<sub>3</sub>N<sub>4</sub> in the absence of light (dark condition);  
 70 (a) Change in UV-Visible absorbance spectra at different time intervals, (b) degradation efficiency,  
 71 (c) absorbance ratio ( $C_t/C_0$ ) versus time, (d) plot of pseudo-first-order kinetics of degradation.

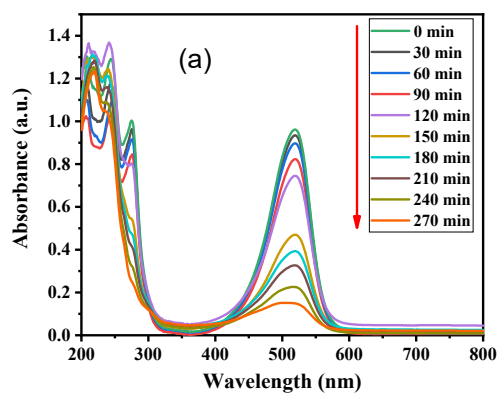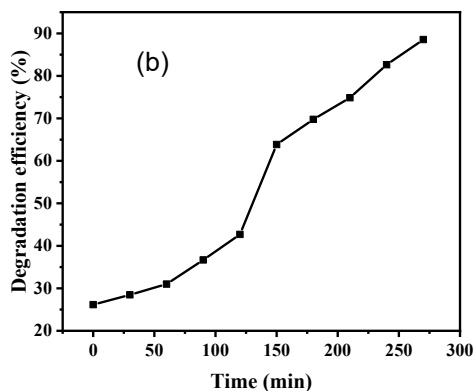

72

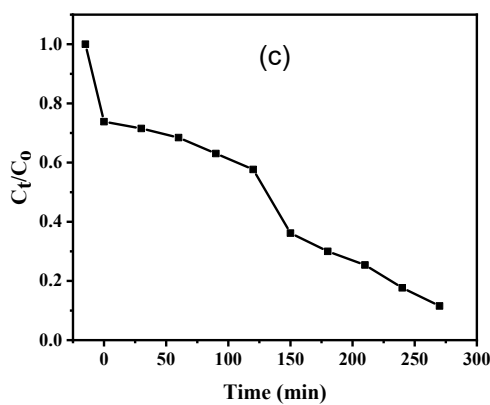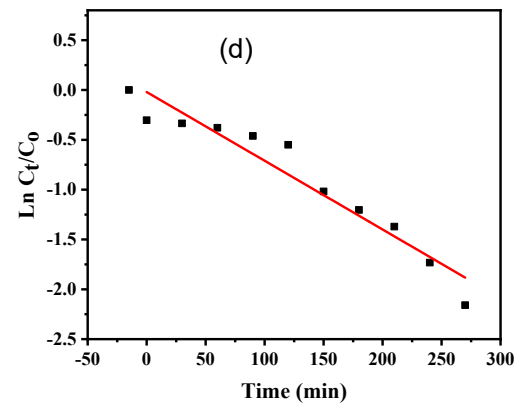

73

74 **Figure S3.** SO degradation with the aid of 0.1g S-g-C<sub>3</sub>N<sub>4</sub> in the presence of light; (a) Change in  
 75 UV-Visible absorbance spectra at different time intervals, (b) degradation efficiency, (c)  
 76 absorbance ratio ( $C_t/C_0$ ) versus time, (d) plot of pseudo-first-order kinetics of degradation.

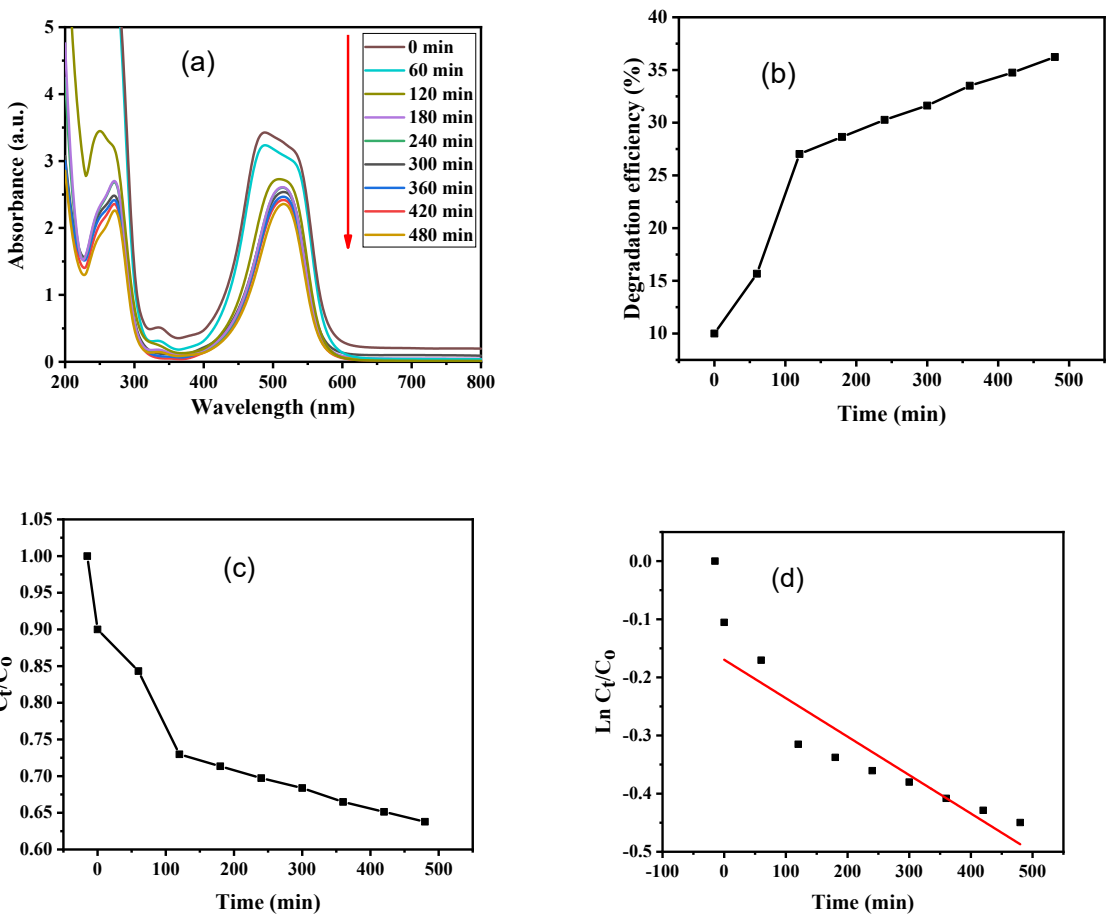

77

78

79 **Figure S4.** SO degradation with the aid of 0.1g S-g-C<sub>3</sub>N<sub>4</sub> in the absence of light (dark condition);  
 80 (a) Change in UV-Visible absorbance spectra at different time intervals, (b) degradation efficiency,  
 81 (c) absorbance ratio ( $C_t/C_0$ ) versus time, (d) plot of pseudo first-order kinetics of degradation.

82

83
